# Supplementary material for: Association Study Reveals Genetic Loci Responsible for Arsenic, Cadmium and Lead Accumulation in Rice Grain in Contaminated Farmlands
Source: Front Plant Sci. 2019 Feb 5;10:61. doi: 10.3389/fpls.2019.00061 (PMC6370710; doi:10.3389/fpls.2019.00061)
Supplement: Supplementary file 4 [file Table_4.xlsx]

## Sheet: Table S4
Table S4. Information on the rice accessions with low grain As (≤ 0.20 mg/kg), Cd (top 10%), and Pb (≤ 0.20 mg/kg) concentrations.
Trait	Accession	Name	As (mg/kg)	Cd (mg/kg)	Pb (mg/kg)	Subpopulation	Country
Low As con.	NSFTV_80	K 65	0.12	0.15	0.69	ADM	Suriname
Low As con.	NSFTV_53	Firooz	0.16	0.19	0.34	ARO	Iran
Low As con.	NSFTV_272	923	0.17	0.039	0.31	ADM	Madagascar
Low As con.	NSFTV_262	Halwa Gose Red	0.17	0.099	0.96	AUS	Iraq
Low As con.	NSFTV_43	Dee Geo Woo Gen	0.17	0.032	0.43	IND	Taiwan
Low As con.	NSFTV_89	NSFTV89	0.17	0.071	0.6	TRJ	Thailand
Low As con.	NSFTV_99	LAC 23	0.17	0.073	0.65	TRJ	Liberia
Low As con.	NSFTV_389	CI 11011	0.18	0.094	0.28	ADM	United States
Low As con.	NSFTV_44	Dhala Shaitta	0.18	0.14	0.65	AUS	Bangladesh
Low As con.	NSFTV_78	Jhona 349	0.18	0.094	1.15	AUS	India
Low As con.	NSFTV_110	Mudgo	0.18	0.035	0.57	IND	India
Low As con.	NSFTV_221	Sadri Belyi	0.19	0.17	0.89	ARO	Azerbaijan
Low As con.	NSFTV_373	Lambayeque 1	0.19	0.089	0.64	ARO	Peru
Low As con.	NSFTV_74	IRGA 409	0.19	0.25	0.95	IND	Brazil
Low As con.	NSFTV_162	TKM6	0.19	0.046	0.41	IND	India
Low As con.	NSFTV_644	IR64-21	0.19	0.14	0.5	IND	Philippines
Low As con.	NSFTV_75	Jambu	0.19	0.13	0.91	TRJ	Indonesia
Low As con.	NSFTV_84	Kaniranga	0.19	0.077	0.51	TRJ	Indonesia
Low As con.	NSFTV_628	Jefferson	0.19	0.13	0.21	TRJ	United States
Low As con.	NSFTV_81	Kalamkati	0.2	0.097	0.32	AUS	India
Low As con.	NSFTV_63	Haginomae Mochi	0.2	0.056	0.37	TEJ	Japan
Low As con.	NSFTV_379	Wanica	0.2	0.085	0.4	TRJ	Suriname
Low As con.	NSFTV_58	Ghati Kamma Nangarhar	0.2	0.14	0.56	AUS	Afghanistan
Low As con.	NSFTV_106	Ming Hui	0.2	0.2	1.56	IND	China
Low Cd con.	NSFTV_311	56-122-23	0.48	0.014	0.24	TEJ	Thailand
Low Cd con.	NSFTV_183	Boa Vista	0.46	0.015	0.26	TRJ	El Salvador
Low Cd con.	NSFTV_325	EMATA A 16-34	0.56	0.018	0.15	IND	Myanmar
Low Cd con.	NSFTV_323	DNJ 140	0.4	0.021	0.39	AUS	Bangladesh
Low Cd con.	NSFTV_7	Arias	0.32	0.024	0.57	TRJ	Indonesia
Low Cd con.	NSFTV_180	Benllok	0.46	0.025	0.3	TEJ	Peru
Low Cd con.	NSFTV_23	Canella De Ferro	0.43	0.03	0.19	TRJ	Brazil
Low Cd con.	NSFTV_9	Baber	0.44	0.031	0.23	TEJ	India
Low Cd con.	NSFTV_395	OS 6 (WC 10296)	0.23	0.032	0.16	TRJ	Zaire
Low Cd con.	NSFTV_157	Tainan Iku 487	0.38	0.032	0.3	TEJ	Taiwan
Low Cd con.	NSFTV_158	Taipei 309	0.43	0.032	0.33	TEJ	Taiwan
Low Cd con.	NSFTV_43	Dee Geo Woo Gen	0.17	0.032	0.43	IND	Taiwan
Low Cd con.	NSFTV_30	Chiem Chanh	0.34	0.034	0.15	IND	Vietnam
Low Cd con.	NSFTV_308	Llanero 501	0.34	0.035	0.27	TRJ	Venezuela
Low Cd con.	NSFTV_110	Mudgo	0.18	0.035	0.57	IND	India
Low Cd con.	NSFTV_187	C57-5043	0.5	0.037	0.21	TRJ	United States
Low Cd con.	NSFTV_186	Bul Zo	0.44	0.039	0.22	TEJ	South Korea
Low Cd con.	NSFTV_272	923	0.17	0.039	0.31	ADM	Madagascar
Low Cd con.	NSFTV_618	Pecos	0.35	0.041	0.29	ADM	United States
Low Cd con.	NSFTV_164	Tondok	0.54	0.043	0.33	TRJ	Indonesia
Low Cd con.	NSFTV_116	NSFTV116	0.23	0.043	0.41	TRJ	Pakistan
Low Cd con.	NSFTV_129	Peh-Kuh	0.38	0.043	0.52	IND	Taiwan
Low Cd con.	NSFTV_31	Chinese	0.28	0.044	0.26	TEJ	China
Low Cd con.	NSFTV_189	Criollo La Fria	0.44	0.044	0.38	IND	Venezuela
Low Cd con.	NSFTV_18	BJ 1	0.36	0.046	0.33	AUS	India
Low Cd con.	NSFTV_162	TKM6	0.19	0.046	0.41	IND	India
Low Cd con.	NSFTV_303	Kihogo	0.42	0.047	0.47	TEJ	Tanzania
Low Pb con.	NSFTV_16	Bico Branco	0.29	0.063	0.11	ARO	Brazil
Low Pb con.	NSFTV_325	EMATA A 16-34	0.56	0.018	0.15	IND	Myanmar
Low Pb con.	NSFTV_30	Chiem Chanh	0.34	0.034	0.15	IND	Vietnam
Low Pb con.	NSFTV_384	318	0.42	0.051	0.15	TRJ	Turkey
Low Pb con.	NSFTV_395	OS 6 (WC 10296)	0.23	0.032	0.16	TRJ	Zaire
Low Pb con.	NSFTV_140	Saturn	0.33	0.059	0.17	ADM	United States
Low Pb con.	NSFTV_23	Canella De Ferro	0.43	0.03	0.19	TRJ	Brazil
Low Pb con.	NSFTV_169	WC 6	0.44	0.065	0.19	TEJ	China
Low Pb con.	NSFTV_624	Kaybonnet	0.21	0.15	0.19	TRJ	United States
